# Supplementary material for: Effects of media multitasking frequency on a novel volitional multitasking paradigm
Source: PeerJ. 2022 Jan 27;10:e12603. doi: 10.7717/peerj.12603 (PMC8801180; doi:10.7717/peerj.12603)
Supplement: Supplemental Information 11 — Note. A significant b-weight indicates the beta-weight and semi-partial correlation are also significant. b represents unstandardized regression weights. beta indicates the standardized regression weights. sr2 represents the semi-partial correlation squared. r represents the zero-order correlation. LL and UL indicate the lower and upper limits of a confidence interval, respectively. * indicates p < .05. ** indicates p < .01. [file peerj-10-12603-s011.docx]

Supplemental Table S10

*Regression results using Primary RT as the criterion*

| Predictor | *b* | *b*  95% CI  [LL, UL] | *beta* | *beta*  95% CI  [LL, UL] | *sr2* | *sr2*  95% CI  [LL, UL] | *r* | Fit | Difference |
| --- | --- | --- | --- | --- | --- | --- | --- | --- | --- |
| (Intercept) | 2.09** | [1.88, 2.31] |  |  |  |  |  |  |  |
| MMI Score | 0.08* | [0.01, 0.14] | 0.24 | [0.03, 0.44] | .06 | [.00, .17] | .24* |  |  |
|  |  |  |  |  |  |  |  | *R2*  = .055* |  |
|  |  |  |  |  |  |  |  | 95% CI[.00,.17] |  |
|  |  |  |  |  |  |  |  |  |  |
| (Intercept) | 1.90** | [1.34, 2.47] |  |  |  |  |  |  |  |
| MMI Score | 0.07* | [0.00, 0.14] | 0.22 | [0.01, 0.43] | .05 | [-.04, .13] | .24* |  |  |
| Total BIS | 0.00 | [-0.01, 0.01] | 0.08 | [-0.14, 0.29] | .01 | [-.02, .03] | .12 |  |  |
|  |  |  |  |  |  |  |  | *R2*  = .061 | Δ*R2*  = .005 |
|  |  |  |  |  |  |  |  | 95% CI[.00,.16] | 95% CI[-.02, .03] |
|  |  |  |  |  |  |  |  |  |  |
| (Intercept) | 2.11** | [1.20, 3.01] |  |  |  |  |  |  |  |
| MMI Score | 0.07* | [0.01, 0.14] | 0.23 | [0.02, 0.44] | .05 | [-.04, .14] | .24* |  |  |
| Total BIS | 0.00 | [-0.01, 0.01] | 0.09 | [-0.13, 0.31] | .01 | [-.03, .04] | .12 |  |  |
| MPI Score | -0.01 | [-0.03, 0.01] | -0.06 | [-0.28, 0.16] | .00 | [-.02, .03] | .01 |  |  |
|  |  |  |  |  |  |  |  | *R2*  = .064 | Δ*R2*  = .003 |
|  |  |  |  |  |  |  |  | 95% CI[.00,.16] | 95% CI[-.02, .03] |
|  |  |  |  |  |  |  |  |  |  |

*Note.* A significant *b*-weight indicates the beta-weight and semi-partial correlation are also significant. *b* represents unstandardized regression weights. *beta* indicates the standardized regression weights. *sr2* represents the semi-partial correlation squared. *r* represents the zero-order correlation. *LL* and *UL* indicate the lower and upper limits of a confidence interval, respectively.
* indicates *p* < .05. ** indicates *p* < .01.
