# Supplementary material for: Effects of media multitasking frequency on a novel volitional multitasking paradigm
Source: PeerJ. 2022 Jan 27;10:e12603. doi: 10.7717/peerj.12603 (PMC8801180; doi:10.7717/peerj.12603)
Supplement: Supplemental Information 13 — Note. A significant b-weight indicates the beta-weight and semi-partial correlation are also significant. b represents unstandardized regression weights. beta indicates the standardized regression weights. sr2 represents the semi-partial correlation squared. r represents the zero-order correlation. LL and UL indicate the lower and upper limits of a confidence interval, respectively. * indicates p < .05. ** indicates p < .01. [file peerj-10-12603-s013.docx]

Supplemental Table S12

*Regression results using Primaryrepeat as the criterion*

| Predictor | *b* | *b*  95% CI  [LL, UL] | *beta* | *beta*  95% CI  [LL, UL] | *sr2* | *sr2*  95% CI  [LL, UL] | *r* | Fit | Difference |
| --- | --- | --- | --- | --- | --- | --- | --- | --- | --- |
| (Intercept) | 2.08** | [1.87, 2.30] |  |  |  |  |  |  |  |
| MMI Score | 0.07* | [0.01, 0.14] | 0.22 | [0.02, 0.43] | .05 | [.00, .16] | .22* |  |  |
|  |  |  |  |  |  |  |  | *R2*  = .051* |  |
|  |  |  |  |  |  |  |  | 95% CI[.00,.16] |  |
|  |  |  |  |  |  |  |  |  |  |
| (Intercept) | 1.95** | [1.38, 2.51] |  |  |  |  |  |  |  |
| MMI Score | 0.07* | [0.00, 0.14] | 0.21 | [0.00, 0.43] | .04 | [-.04, .13] | .22* |  |  |
| Total BIS | 0.00 | [-0.01, 0.01] | 0.06 | [-0.16, 0.27] | .00 | [-.02, .02] | .10 |  |  |
|  |  |  |  |  |  |  |  | *R2*  = .054 | Δ*R2*  = .003 |
|  |  |  |  |  |  |  |  | 95% CI[.00,.15] | 95% CI[-.02, .02] |
|  |  |  |  |  |  |  |  |  |  |
| (Intercept) | 1.76** | [1.18, 2.35] |  |  |  |  |  |  |  |
| MMI Score | 0.08* | [0.01, 0.15] | 0.25 | [0.04, 0.46] | .06 | [-.03, .15] | .22* |  |  |
| Total BIS | -0.00 | [-0.01, 0.01] | -0.01 | [-0.22, 0.21] | .00 | [-.00, .00] | .10 |  |  |
| MPI Score | 0.01* | [0.00, 0.02] | 0.22 | [0.01, 0.43] | .04 | [-.04, .12] | .19 |  |  |
|  |  |  |  |  |  |  |  | *R2*  = .098* | Δ*R2*  = .044* |
|  |  |  |  |  |  |  |  | 95% CI[.00,.20] | 95% CI[-.04, .12] |
|  |  |  |  |  |  |  |  |  |  |

*Note.* A significant *b*-weight indicates the beta-weight and semi-partial correlation are also significant. *b* represents unstandardized regression weights. *beta* indicates the standardized regression weights. *sr2* represents the semi-partial correlation squared. *r* represents the zero-order correlation. *LL* and *UL* indicate the lower and upper limits of a confidence interval, respectively.
* indicates *p* < .05. ** indicates *p* < .01.
