# Supplementary material for: Effects of media multitasking frequency on a novel volitional multitasking paradigm
Source: PeerJ. 2022 Jan 27;10:e12603. doi: 10.7717/peerj.12603 (PMC8801180; doi:10.7717/peerj.12603)
Supplement: Supplemental Information 15 — Task files are available in the OSF repository: Lopez, Jesus, and Joseph M Orr. 2021. “Effects of Media Multitasking Frequency on a Novel Volitional Multitasking Paradigm.” OSF. August 13. doi:10.17605/OSF.IO/NJU8A. [file peerj-10-12603-s015.xlsx]

## Sheet: Sheet1
operation	correct	word	corrAns	blocks.thisRepN	blocks.thisTrialN	blocks.thisN	blocks.thisIndex	trial.thisRepN	trial.thisTrialN	trial.thisN	trial.thisIndex	secondarytasktrial.thisRepN	secondarytasktrial.thisTrialN	secondarytasktrial.thisN	secondarytasktrial.thisIndex	blockNum	popup	response	math_correct	response_rt	TotalPoints	Trial Number	switch_rt	wordproblem_correct	wordproblem_rt_0	wordproblem_response	wordproblem_rt_1	participant	date	expName	psychopyVersion	frameRate
The math operation displayed on screen for any given trial	The correct response for the operation in the current trial; either "c" or "I".	The program generates a possible stimuli for the secondary task during every trial, whether the secondary task is engaged or not. This column displays what the word on any trial is.	The correct answer for the secondary task during any given trial.	Generated by the program used. Not used in any analysis.	Generated by the program used. Not used in any analysis.	Generated by the program used. Not used in any analysis.	Generated by the program used. Not used in any analysis.	Generated by the program used. Not used in any analysis.	Generated by the program used. Not used in any analysis.	Generated by the program used. Not used in any analysis.	Generated by the program used. Not used in any analysis.	Generated by the program used. Not used in any analysis.	Generated by the program used. Not used in any analysis.	Generated by the program used. Not used in any analysis.	Generated by the program used. Not used in any analysis.	Block number for the experiment.	Number chosen by the random number generator that determines whether the popup prompt appears during any primary trial. Numbers range from "0" through "6", with "1" indicating a popup prompt appeared.	Key pressed by the participant during any given primary trial. Possible entries are "c", "I", or "y" (indicating a switch to the secondary task), or blank.	Indicates whether the participant answered the primary task (the math problem) correctly. Possible entries include "TRUE", "FALSE", or "N/A" (denoting a task switch).	The time elapsed before a participant responded to the primary task ("c", "I") in seconds. If there was no response, it will instead display "N/A". If a participant opted to switch tasks (by pressing "y" on relevant trials, this will column will instead be blank.	The total amount of points the participant has accrued throughout the experiment.	Incorrectly coded trial number column. Not used in any analyses.	If a participant decided to switch tasks, their reaction time (in seconds) to elect to switch will be displayed in this column.	Indicated whether the participant answered the secondary task correctly. Possible entries are "TRUE", "FALSE" or "N/A" if the participant failed to respond in time.	Because each word problem in the secondary task is missing two letters, the program records the time elapsed before each key was pressed. This column denotes the time taken to respond with the first letter missing.	This column indicates the letters pressed during the secondary task with no spaces.	Because each word problem in the secondary task is missing two letters, the program records the time elapsed before each key was pressed. This column denotes the time taken to respond with the second letter missing. As this encompasses the total time to complete the task, the time used in this column is used in analyses.	Participant number.	Date.	The experiment name entered into the program used.	PsychoPy Version used	Framerate for any given trial.
