# Supplementary material for: Effects of media multitasking frequency on a novel volitional multitasking paradigm
Source: PeerJ. 2022 Jan 27;10:e12603. doi: 10.7717/peerj.12603 (PMC8801180; doi:10.7717/peerj.12603)
Supplement: Supplemental Information 16 [file peerj-10-12603-s016.xlsx]

## Sheet: Sheet1
Participant	switchrate	totalswitches	switchrt	rtnopopup	rtpopnoswitch	rtsecondary	rtprimary	totalpopups	Primaryreturn	accprimary	accsecondary	primcorrect	secondcorrect	MMIscore	repeatrt	MPIScore	Attentional	MotorFirstOrder	Nonplanning	Attention	CognitiveInstability	Motor	Perseverance	SelfControl	CognitiveComplexity	TotalBIS	What do you consider to be your gender identity	What is your current age?	Are you colorblind? - Selected Choice	How many years of education have you completed? (e.g., High school degree = 12; college degree = 16; master's degree = 18; doctorate or professional degree = 20)	How to do identify in terms of race/ethnic background (check all that apply)? - Selected Choice	How to do identify in terms of race/ethnic background (check all that apply)? - Other (please specify) - Text	How often do you use tobacco?	How often do you drink alcohol?	In what quantity do you drink alcohol in each drinking session?	How often do you take recreational drugs (including recreational prescription drug use?	returnCost	interferenceCost	SwitchGroup
Participant Number	Switch Rate, calculated by dividing number of switches possible by number of switches made.	Total switches possible.	Referred to as Popupselect in the manuscript. Average RT to elect a switch on relevant trials.	Referred to as Primarynopopup in the manuscript. Average RT on primary trials in which no popup occurred.	Referred to as Popupignore in the manuscript. Average RT on primary trials in which a popup occurred but was not attended to.	Referred to as Secondary RT in the manuscript. Average RT to complete the secondary task.	Referred to as Primary RT in the manuscript. Average RT to complete the primary task.	Total number of popups for each participant.	Average RT on primary trials following a switch, regardless of availability of a switch .	Accuracy on primary task	Accuracy on secondary task.	Number of correct responses to the primary task.	Number of correct responses on the secondary task.	MMI Score as calculated using the original Ophir et al. formula.	Referred to as Primaryrepeat in the manuscript. Average RT on trials in which the individual repeated the primary task.	MPI score as calculated according to Poposki and colleagues.	Attentional order factor of the BIS-11.	Motor order factor of the BIS-11.	Nonplanning order factor of the BIS-11.	Attention order factor of the BIS-11.	Cognitive Instability order factor of the BIS-11.	Motor order factor of the BIS-11.	Perseverance order factor of the BIS-11.	Self control order factor of the BIS-11.	Cognitive control order factor of the BIS-11.	Total BIS score as calculated according to the BIS-11.	Demographic information, not used in analyses.	Demographic information, not used in analyses.	Demographic information, not used in analyses.	Demographic information, not used in analyses.	Demographic information, not used in analyses.	Demographic information, not used in analyses.	Demographic information, not used in analyses.	Demographic information, not used in analyses.	Demographic information, not used in analyses.	Demographic information, not used in analyses.	Average difference in reaction time for primary tasks following a switch to the secondary task minus the reaction time for all other primary task trials without a popup.	Average difference in reaction time for primary task trials with a non-selected pop-up and primary task trials without a pop-up .	Used to denote whether participant switched at all during the experiment. 0 indicates no switches at all, 1 indicates at least one task switch.
