# Supplementary material for: Effects of media multitasking frequency on a novel volitional multitasking paradigm
Source: PeerJ. 2022 Jan 27;10:e12603. doi: 10.7717/peerj.12603 (PMC8801180; doi:10.7717/peerj.12603)
Supplement: Supplemental Information 17 [file peerj-10-12603-s017.xlsx]

## Sheet: AllDataDemo2
Participant	switchrate	totalswitches	switchrt	rtnopopup	rtpopnoswitch	rtsecondary	rtprimary	totalpopups	Primaryreturn	accprimary	accsecondary	primcorrect	secondcorrect	MMIscore	repeatrt	MPIScore	Attentional	MotorFirstOrder	Nonplanning	Attention	CognitiveInstability	Motor	Perseverance	SelfControl	CognitiveComplexity	TotalBIS	What do you consider to be your gender identity	What is your current age?	Are you colorblind? - Selected Choice	How many years of education have you completed? (e.g., High school degree = 12; college degree = 16; master's degree = 18; doctorate or professional degree = 20)	How to do identify in terms of race/ethnic background (check all that apply)? - Selected Choice	How to do identify in terms of race/ethnic background (check all that apply)? - Other (please specify) - Text	How often do you use tobacco?	How often do you drink alcohol?	In what quantity do you drink alcohol in each drinking session?	How often do you take recreational drugs (including recreational prescription drug use?	returnCost	interferenceCost	SwitchGroup
1	0.65	13	1.26401	2.0978	2.39232	2.38115	2.11183	20	2.04635	0.986395	0.615385	145	8	3.15345	2.11784	37	15	19	17	8	7	13	6	9	8	51	Female	19	No	12	White (German, Irish, English, Italian, Polish, French, etc.)		Never	Only occasionally	1-2 drinks	Never	-0.0514508	0.294517	1
2	0.137931	4	1.72234	2.02254	1.86383	1.94317	1.99677	29	2.29354	0.833333	1	130	4	4.06855	1.96259	29	22	30	32	16	6	22	8	18	14	84	Female	19	No	12	White (German, Irish, English, Italian, Polish, French, etc.)		Never	1-2 times a week	1-2 drinks	Never	0.271007	-0.158709	1
3	0.05	1	1.86844	2.32858	2.15993	1.61769	2.3083	20	2.26828	0.918239	1	146	1	2.53393	2.29244	54	21	33	33	17	4	23	10	19	14	87	Female	19	No	12	White (German, Irish, English, Italian, Polish, French, etc.)		Never	1-2 times a week	3-5 drinks	Daily	-0.0602926	-0.168642	1
4	0.171429	6	1.17603	1.7139	1.66262	2.6024	1.70424	35	2.0987	0.876623	0.666667	135	4	4.06447	1.68262	37	15	20	17	9	6	15	5	8	9	52	Male	19	No	12	Black or African American (e.g., African American, Jamaican, Haitian, Nigerian, Somalian, etc.)		Never	Only occasionally	3-5 drinks	Only occasionally	0.384803	-0.0512769	1
6	0.103448	3	1.36232	1.78222	1.72194	2.41077	1.77223	29	1.51203	0.955414	0.333333	150	1	2.25325	1.7861	32	17	23	21	11	6	15	8	13	8	61	Female	19	No	12	White (German, Irish, English, Italian, Polish, French, etc.)		Never	Only occasionally	1-2 drinks	Never	-0.270191	-0.0602788	1
7	0.548387	17	1.4364	2.33424	2.32985	2.67419	2.3338	31	2.44196	0.937063	0.588235	134	10	2.36563	2.33045	48	15	19	26	9	6	13	6	12	14	60	Male	18	No	12	Other (please specify)	first 2 option choices	Never	Only occasionally	3-5 drinks	Never	0.107723	-0.00438577	1
8	0.0333333	1	0.0999214	1.49333	1.61903	3.1865	1.51626	30		0.874214	0	139	0	2.3125	1.499	40	13	20	27	8	5	15	5	15	12	60	Male	18	No	12	Hispanic, Latin, or Spanish origin (e.g., Mexican or Mexican American, Puerto Rican, Cuban, Dominican etc.)		Never	Only occasionally	More than 5 drinks	Daily		0.125697	0
9	0.233333	7	1.46912	2.37321	2.43228	2.98354	2.38176	30	2.88266	0.954248	0	146	0	1.6625	2.37124	40	13	15	24	9	4	9	6	13	11	52	Female	19	No	13	White (German, Irish, English, Italian, Polish, French, etc.)		Never	Only occasionally	1-2 drinks	Never	0.509455	0.0590728	1
10	0.48	12	1.38434	2.81916	3.43623	2.93792	2.87023	25	3.3547	0.932432	0.583333	138	7	3.70294	2.83244	37	14	20	18	9	5	15	5	6	12	52	Female	19	No	12	Hispanic, Latin, or Spanish origin (e.g., Mexican or Mexican American, Puerto Rican, Cuban, Dominican etc.)		Never	Never	Never	Never	0.535543	0.61707	1
11	0	0		2.01307	2.00309		2.01151	25		0.9875		158		2.31481	2.00307	18	16	12	15	10	6	7	5	6	9	43	Female	18	No	12	Hispanic, Latin, or Spanish origin (e.g., Mexican or Mexican American, Puerto Rican, Cuban, Dominican etc.)		Never	Never	Never	Never		-0.0099734	0
12	0.448276	13	1.14651	2.57212	2.32953	2.3406	2.5465	29	2.70926	0.904762	0.846154	133	11	1.67448	2.51671	38	14	21	22	8	6	13	8	12	10	57	Female	19	No	12	White (German, Irish, English, Italian, Polish, French, etc.)		Never	Only occasionally	Only occasionally	Never	0.137139	-0.242597	1
13	0.225806	7	1.28438	2.12826	2.53645	2.09211	2.19003	31	2.2321	0.960784	0.857143	147	6	3.34722	2.18932	34	17	19	25	10	7	11	8	13	12	61	Female	18	No	12	White (German, Irish, English, Italian, Polish, French, etc.)		Never	Never	Never	Never	0.103841	0.408192	1
14	0	0		1.9453	1.77408		1.91534	28		0.98125		157	0	3.2601	1.9114	19	13	22	19	8	5	13	9	8	11	54	Male	18	No	12	White (German, Irish, English, Italian, Polish, French, etc.)		Never	Never	Never	Never		-0.171217	0
15	0.242424	8	1.00948	2.417	2.40402	2.20735	2.41485	33	2.34355	0.921053	0.5	140	4	2.99315	2.41705	49	23	24	21	14	9	16	8	10	11	68	Female	19	No	12	White (German, Irish, English, Italian, Polish, French, etc.)		Never	Never	Never	Never	-0.073445	-0.0129784	1
16	0.0740741	2	1.7521	1.93759	1.8824	2.30211	1.92886	27	2.77706	0.879747	0.5	139	1	3.5675	1.90773	30	11	19	24	8	3	11	8	13	11	54	Female	22	No	15	Native Hawaiian or Other Pacific Islander (e.g., Samoan, Tongan, Fijian, etc.)		Never	Only occasionally	3-5 drinks	Daily	0.839468	-0.055186	1
17	0	0		2.13851	2.14103		2.13894	27		0.9375		150	0	4.09151	2.13501	29	18	16	25	14	4	12	4	14	11	59	Female	19	No	12	White (German, Irish, English, Italian, Polish, French, etc.)		Never	Only occasionally	3-5 drinks	Only occasionally		0.00252359	0
18	0	0		2.33219	2.2023		2.31027	27		0.975		156	0	2.48649	2.29982	26	24	19	26	16	8	14	5	16	10	69	Male	19	No	13.5	Hispanic, Latin, or Spanish origin (e.g., Mexican or Mexican American, Puerto Rican, Cuban, Dominican etc.)		Never	Only occasionally	1-2 drinks	Never		-0.12989	0
19	0.423077	11	1.14969	3.25771	3.49688	3.49778	3.28263	26	4.12788	0.85906	0.454545	128	5	3.745	3.22852	57	27	27	28	19	8	22	5	14	14	82	Female	19	No	14	White (German, Irish, English, Italian, Polish, French, etc.)		Never	1-2 times a week	3-5 drinks	Never	0.870168	0.23917	1
20	0.117647	4	1.28022	2.31689	2.40443	4.6714	2.33395	34	3.06094	0.967949	0.25	151	1	3.36667	2.27886	34	19	20	20	11	8	13	7	10	10	59	Male	19	No	12	White (German, Irish, English, Italian, Polish, French, etc.)		Rarely (~1 a week)	2-3 times a week	More than 5 drinks	3-5 times a week	0.744049	0.0875363	1
21	0	0		2.78124	2.99575		2.81403	24		0.9		144	0	4.25562	2.80583	25	13	22	26	9	4	15	7	14	12	61	Female	20	Not sure	13	Black or African American (e.g., African American, Jamaican, Haitian, Nigerian, Somalian, etc.)		Never	Only occasionally	1-2 drinks	Never		0.214509	0
22	0.625	15	1.28428	2.21566	2.00436	2.52799	2.20254	24	2.22961	0.972414	0.533333	141	8	2.87374	2.20126	31	14	18	23	8	6	12	6	10	13	55	Female	19	No	12	White (German, Irish, English, Italian, Polish, French, etc.)		Never	Never	Never	Never	0.0139501	-0.211292	1
23	0.575758	19	1.28822	1.95962	1.98652	2.23085	1.96229	33	2.13474	0.950355	0.736842	134	14	2.15476	1.94257	52	20	31	29	14	6	22	9	17	12	80	Female	20	No	13	White (German, Irish, English, Italian, Polish, French, etc.)		Rarely (~1 a week)	Never	Never	Never	0.175118	0.0268966	1
24	0	0		2.18329	2.27789		2.20103	30		0.9625		154	0	2.51887	2.20612	50	24	23	28	14	10	18	5	16	12	75	Female	18	No	12	White (German, Irish, English, Italian, Polish, French, etc.)		Never	Never	Never	Never		0.0946049	0
25	0.956522	22	1.23389	2.24992	2.85096	2.95574	2.25434	23	2.50847	0.934783	0.681818	129	15	4.99819	2.18856	44	15	25	23	9	6	18	7	9	14	63	Male	19	Not sure	12	Mixed Race		Never	Only occasionally	1-2 drinks	Never	0.258548	0.60104	1
26	0	0		2.31643	2.40178		2.33244	30		0.975		156	0	2.925	2.32849	26	20	27	29	14	6	19	8	16	13	76	Male	19	No	12	White (German, Irish, English, Italian, Polish, French, etc.)		Never	Never	Never	Never		0.0853414	0
27	0.393939	13	1.48596	2.00037	1.72069	2.33203	1.96206	33	2.16497	0.897959	0.692308	132	9	3.81579	1.9448	49	21	22	28	13	8	13	9	14	14	71	Female	21	No	15	White (German, Irish, English, Italian, Polish, French, etc.)		Never	1-2 times a week	3-5 drinks	Never	0.164601	-0.27968	1
28	0.863636	19	1.32289	2.07258	1.95686	2.31868	2.07012	22	2.2212	0.907801	0.736842	128	14	2.87186	2.04215	50	20	17	16	13	7	12	5	11	5	53	Female	22	No	15	White (German, Irish, English, Italian, Polish, French, etc.)		Never	Only occasionally	1-2 drinks	Never	0.148615	-0.115717	1
29	0.482759	14	1.40868	1.99479	2.40301	2.54821	2.03673	29	2.36087	0.972603	0.714286	142	10	3.40877	1.97871	45	18	22	23	9	9	16	6	12	11	63	Female	19	No	12	Hispanic, Latin, or Spanish origin (e.g., Mexican or Mexican American, Puerto Rican, Cuban, Dominican etc.)		Never	Only occasionally	1-2 drinks	Never	0.366077	0.40822	1
30	0	0		2.32747	2.40407		2.34144	30		0.93125		149	0	4.10475	2.28804	37	18	24	18	10	8	16	8	8	10	60	Female	19	No	12	Black or African American (e.g., African American, Jamaican, Haitian, Nigerian, Somalian, etc.)		Rarely (~1 a week)	Only occasionally	1-2 drinks	Only occasionally		0.0765978	0
31	0.466667	14	0.77406	2.72427	2.65105	2.33063	2.71613	30	2.77509	0.910959	0.714286	133	10	2.87313	2.71771	59	16	18	27	10	6	13	5	15	12	61	Male	18	No	14	White (German, Irish, English, Italian, Polish, French, etc.)		Never	Only occasionally	More than 5 drinks	Only occasionally	0.0508253	-0.0732191	1
32	0.162162	6	1.04811	2.01635	1.8784	2.90834	1.98858	37	2.68227	0.87013	0.333333	134	2	4.26429	1.95226	18	22	16	25	14	8	11	5	11	14	63	Female	18	No	12	White (German, Irish, English, Italian, Polish, French, etc.)		Never	2-3 times a week	3-5 drinks	Only occasionally	0.665926	-0.137941	1
33	0	0		2.57192	2.51236		2.56255	25		0.9125		146	0	4.79065	2.56002	32	14	20	21	10	4	16	4	9	12	55	Female	19	No	12	Hispanic, Latin, or Spanish origin (e.g., Mexican or Mexican American, Puerto Rican, Cuban, Dominican etc.)		Never	Only occasionally	1-2 drinks	Never		-0.0595551	0
34	0.388889	14	0.913109	2.19738	2.23371	2.32986	2.20285	36	2.18631	0.986301	0.428571	144	6	2.682	2.19914	67	25	26	26	15	10	20	6	17	9	77	Female	19	No	12	Black or African American (e.g., African American, Jamaican, Haitian, Nigerian, Somalian, etc.)		Never	Only occasionally	More than 5 drinks	Only occasionally	-0.0110729	0.0363254	1
35	0.7	14	1.49147	1.96801	2.37109	2.4903	1.98458	20	2.22058	0.972603	0.857143	142	12	2.62391	1.95349	21	14	28	27	10	4	22	6	15	12	69	Male	20	No	12	Mixed Race		Never	Only occasionally	3-5 drinks	Never	0.252564	0.403077	1
36	0.633333	19	0.988584	2.45208	2.12135	2.17307	2.42628	30	2.34743	0.921986	0.631579	130	12	2.77759	2.42322	42	15	25	21	10	5	19	6	9	12	61	Female	19	No	13	White (German, Irish, English, Italian, Polish, French, etc.)		Never	Only occasionally	1-2 drinks	Never	-0.10465	-0.330729	1
37	0.136364	3	1.18886	2.89666	2.77663	2.18509	2.88175	22	3.51983	0.834395	0.666667	131	2	6.41206	2.86569	47	23	26	33	17	6	18	8	18	15	82	Female	19	No	12	White (German, Irish, English, Italian, Polish, French, etc.)		Never	Never	Never	Only occasionally	0.623177	-0.12003	1
38	0.64	16	0.826549	2.35051	2.50015	2.64172	2.36006	25	2.89898	0.868056	0.625	125	10	5.69353	2.25624	53	26	28	26	15	11	20	8	15	11	80	Male	19	No	14	White (German, Irish, English, Italian, Polish, French, etc.)		Frequently (> 5 a day)	2-3 times a week	More than 5 drinks	3-5 times a week	0.548472	0.149645	1
39	0.8	24	1.2219	1.76525	1.75405	2.13037	1.76476	30	1.92188	0.970588	0.833333	132	20	1.9256	1.73583	51	13	20	25	8	5	13	7	14	11	58	Male	19	No	12	White (German, Irish, English, Italian, Polish, French, etc.)		Never	Never	Never	Never	0.156628	-0.0112049	1
40	0.030303	1	1.7017	3.27296	2.98772		3.21435	33	4.30383	0.836478	0	133	0	3.35489	3.20351	25	18	24	27	10	8	16	8	14	13	69	Female	20	No	12	White (German, Irish, English, Italian, Polish, French, etc.)		Never	Only occasionally	3-5 drinks	Never	1.03088	-0.285241	1
41	0.296296	8	1.46538	2.86856	3.21935	2.07391	2.91122	27	3.16093	0.934211	0.625	142	5	2.64096	2.89358	37	18	22	23	12	6	15	7	12	11	63	Male	19	No	12	White (German, Irish, English, Italian, Polish, French, etc.)		Never	Never	Never	Never	0.292368	0.350787	1
42	0.214286	6	1.21751	2.97958	2.93716	2.89713	2.97373	28	3.80321	0.902597	0.833333	139	5	2.5	2.96188	28	18	23	25	11	7	16	7	13	12	66	Female	19	No	12	White (German, Irish, English, Italian, Polish, French, etc.)		Never	1-2 times a week	1-2 drinks	Never	0.823631	-0.0424246	1
43	0	0		1.74923	1.71763		1.74409	26		0.925		148	0	1.76316	1.72941	28	15	16	18	9	6	10	6	9	9	49	Female	19	No	12	White (German, Irish, English, Italian, Polish, French, etc.)		Never	Never	Never	Never		-0.0316007	0
44	0.333333	7	1.48306	2.75659	3.09006	3.21312	2.78327	21	2.48278	0.908497	0.428571	139	3	3.53274	2.80564	48	16	19	21	8	8	12	7	8	13	56	Female	20	No	12	Hispanic, Latin, or Spanish origin (e.g., Mexican or Mexican American, Puerto Rican, Cuban, Dominican etc.)		Never	Only occasionally	1-2 drinks	Never	-0.273811	0.333473	1
46	0.5	17	1.25186	1.77934	1.95795	3.17935	1.80058	34	2.14029	0.965035	0.529412	138	9	1.13043	1.74951	48	27	20	26	18	9	14	6	13	13	73	Female	19	No	12	Asian (e.g., Chinese, Japanese, Korean, Vietnamese, etc.)		Never	Only occasionally	3-5 drinks	3-5 times a week	0.36095	0.178609	1
47	0.6	21	0.98276	2.71893	2.7156	2.95593	2.71859	35	2.61352	0.920863	0.428571	128	9	3.65728	2.74813	50	16	18	23	10	6	12	6	12	11	57	Male	18	No	12	Hispanic, Latin, or Spanish origin (e.g., Mexican or Mexican American, Puerto Rican, Cuban, Dominican etc.)		Never	Never	Never	Never	-0.105412	-0.00333196	1
48	0	0		1.94087	2.076		1.96212	26		0.95		152	0	1.40517	1.97448	39	15	20	19	8	7	14	6	8	11	54	Female	20	No	13	White (German, Irish, English, Italian, Polish, French, etc.)		Never	Never	Never	Never		0.135128	0
49	0.0384615	1	1.368	1.65649	1.73298	1.88428	1.66851	26	1.33433	0.968553	1	154	1	1.57075	1.67674	25	21	30	24	13	8	23	7	12	12	75	Female	18	No	12.5	Asian (e.g., Chinese, Japanese, Korean, Vietnamese, etc.)		Never	Only occasionally	3-5 drinks	Never	-0.322159	0.0764977	1
50	0.961538	25	1.63432	2.35632	1.56778	2.50594	2.35044	26	2.47934	0.955556	0.56	129	14	1.89315	2.31034	34	16	19	20	10	6	14	5	10	10	55	Female	19	No	13	White (German, Irish, English, Italian, Polish, French, etc.)		Never	1-2 times a week	3-5 drinks	Never	0.123022	-0.788539	1
51	0.807692	21	1.20915	2.03814	1.88767	3.04202	2.03273	26	2.04213	0.964029	0.619048	134	13	2.91223	2.02191	40	21	25	26	11	10	19	6	13	13	72	Male	18	No	12	Hispanic, Latin, or Spanish origin (e.g., Mexican or Mexican American, Puerto Rican, Cuban, Dominican etc.)		Never	Only occasionally	3-5 drinks	Never	0.00398808	-0.150468	1
52	0.37931	11	1.40129	2.50461	2.58457	2.99363	2.51433	29	3.03265	0.95302	0.818182	142	9	3.60045	2.49285	39	16	22	25	10	6	16	6	11	14	63	Female	19	No	12	White (German, Irish, English, Italian, Polish, French, etc.)		Never	Only occasionally	Only occasionally	Never	0.528046	0.0799684	1
53	0.52381	11	1.44672	3.03964	2.9623	3.01389	3.03431	21	3.21918	0.919463	0.818182	137	9	1.52358	3.02593	62	15	18	23	9	6	13	5	12	11	56	Female	19	No	12	Indian subcontinent origin (e.g., Indian, Sri Lankan, Pakistani, etc.)		Never	Never	Never	Never	0.179537	-0.0773423	1
54	0.047619	1	2.63582	2.85716	3.13836		2.89393	21	4.20345	0.792453	0	126	0	2.59375	2.92663	40	15	24	26	9	6	19	5	12	14	65	Female	19	No	12	Mixed Race		Never	Never	Never	Never	1.34629	0.2812	1
55	0	0		2.09542	2.32502		2.12699	22		0.99375		159	0	2.86898	2.13253	43	15	18	19	9	6	12	6	10	9	52	Male	21	No	12	White (German, Irish, English, Italian, Polish, French, etc.)		Never	2-3 times a week	More than 5 drinks	Never		0.229595	0
56	0	0		2.47456	2.69106		2.50451	22		0.98125		157	0	2.025	2.48529	26	15	14	23	10	5	10	4	13	10	52	Male	20	No	13	Hispanic, Latin, or Spanish origin (e.g., Mexican or Mexican American, Puerto Rican, Cuban, Dominican etc.)		Never	Only occasionally	1-2 drinks	Only occasionally		0.216504	0
57	0	0		1.61558	1.51655		1.60196	22		0.9125		146	0	6.51307	1.6026	30	16	24	23	10	6	18	6	10	13	63	Female	18	No	12	Asian (e.g., Chinese, Japanese, Korean, Vietnamese, etc.)		Never	1-2 times a week	More than 5 drinks	Only occasionally		-0.0990301	0
58	0.217391	5	2.14882	2.04823	1.84966	2.36895	2.02517	23	3.10672	0.974194	0.6	151	3	0.313953	1.96755	30	13	15	23	9	4	9	6	11	12	51	Male	19	No	12	White (German, Irish, English, Italian, Polish, French, etc.)		Never	Only occasionally	3-5 drinks	Never	1.05849	-0.198562	1
59	0	0		2.52418	2.51905		2.52336	27		0.89375		143	0	2.12791	2.6186	49	13	15	19	7	6	10	5	11	8	47	Female	19	No	13	White (German, Irish, English, Italian, Polish, French, etc.)		Never	Only occasionally	1-2 drinks	Never		-0.00513327	0
60	0	0		2.8214	2.62885		2.77833	35		0.8625		138	0	4.71185	2.79535	31	18	21	23	12	6	14	7	14	9	62	Female	21	No	14	Asian (e.g., Chinese, Japanese, Korean, Vietnamese, etc.)		Never	Only occasionally	3-5 drinks	Never		-0.192542	0
61	0.227273	5	1.39446	2.42158	2.40395	2.81924	2.41963	22	3.29956	0.954839	0.4	148	2	3.73624	2.3832	37	18	24	21	10	8	16	8	11	10	63	Female	19	No	12	Asian (e.g., Chinese, Japanese, Korean, Vietnamese, etc.)		Never	Never	Never	Never	0.877988	-0.0176212	1
62	0.05	1	1.48462	2.3752	2.43184	3.01902	2.38169	20		0.930818	0	148	0	5.89615	2.36802	32	15	20	20	10	5	14	6	10	10	55	Female	19	No	12	White (German, Irish, English, Italian, Polish, French, etc.)		Never	Only occasionally	1-2 drinks	Never		0.0566386	0
63	0.0769231	3	0.856109	2.71343	2.4627	2.62465	2.6552	39	3.47821	0.968153	0.666667	152	2	1.76724	2.6649	29	21	19	18	11	10	13	6	11	7	58	Female	19	No	12	White (German, Irish, English, Italian, Polish, French, etc.)		Never	Never	Never	Never	0.764779	-0.250736	1
64	0.904762	19	1.09898	2.709	2.13161	2.53836	2.70069	21	3.06899	0.893617	0.736842	126	14	1.38542	2.66559	28	19	18	29	11	8	11	7	13	16	66	Female	19	No	12	Hispanic, Latin, or Spanish origin (e.g., Mexican or Mexican American, Puerto Rican, Cuban, Dominican etc.)		Never	1-2 times a week	3-5 drinks	Never	0.359995	-0.577388	1
65	0.323529	11	1.47126	3.08778	2.86564	2.68573	3.05205	34	3.64075	0.852349	0.363636	127	4	5.65767	2.97253	27	21	27	26	14	7	18	9	16	10	74	Female	19	No	12	Hispanic, Latin, or Spanish origin (e.g., Mexican or Mexican American, Puerto Rican, Cuban, Dominican etc.)		Never	1-2 times a week	3-5 drinks	Daily	0.552975	-0.222143	1
66	0.642857	18	1.20811	1.9937	2.07431	2.16126	1.99938	28	2.20397	0.978873	0.888889	139	16	2.69444	1.98225	42	18	24	22	11	7	16	8	13	9	64	Female	19	No	13	White (German, Irish, English, Italian, Polish, French, etc.)		Never	Never	Never	1-2 times a week	0.21027	0.0806008	1
67	0.923077	24	1.06021	2.17641	1.79266	2.488	2.17077	26	2.4862	0.948529	0.833333	129	20	3.13889	2.10809	56	19	18	27	13	6	14	4	14	13	64	Female	19	No	13.5	Hispanic, Latin, or Spanish origin (e.g., Mexican or Mexican American, Puerto Rican, Cuban, Dominican etc.)		Never	Only occasionally	More than 5 drinks	Never	0.309787	-0.383747	1
68	0	0		1.97901	2.0331		1.98848	21		0.7125		114	0	1.375	1.98126	41	18	18	24	11	7	13	5	12	12	60	Male	19	No	12	White (German, Irish, English, Italian, Polish, French, etc.)		Never	Never	Never	Never		0.0540858	0
70	0	0		2.61912	2.71012		2.63505	28		0.9125		146	0	5.40116	2.62567	40	19	24	24	12	7	14	10	12	12	67	Female	18	No	12	Hispanic, Latin, or Spanish origin (e.g., Mexican or Mexican American, Puerto Rican, Cuban, Dominican etc.)		Never	Never	Never	Never		0.0909952	0
71	0.241379	7	1.57281	2.38896	2.40772	1.86827	2.39169	29	2.46849	0.941176	0.857143	144	6	3.57456	2.40501	34	17	15	21	10	7	8	7	8	13	53	Female	19	No	12	Mixed Race		Never	Never	Never	Daily	0.0795322	0.0187645	1
72	0.333333	9	1.60503	1.93018	2.10515	2.25747	1.95104	27	2.17021	0.907285	0.555556	137	5	1.75556	1.93203	48	20	28	30	15	5	20	8	15	15	78	Female	18	No	12	White (German, Irish, English, Italian, Polish, French, etc.)		Never	Only occasionally	3-5 drinks	1-2 times a week	0.240025	0.174968	1
73	0.151515	5	1.16434	1.83673	1.94121	2.94616	1.8556	33	1.75068	0.987097	1	153	5	1.12288	1.84257	26	20	18	25	14	6	12	6	13	12	63	Female	18	No	12	Asian (e.g., Chinese, Japanese, Korean, Vietnamese, etc.)		Never	Only occasionally	1-2 drinks	Never	-0.0860459	0.104484	1
74	0.592593	16	1.40728	2.90596	2.88191	2.80718	2.90407	27	3.53129	0.902778	0.4375	130	7	2.11	2.81145	64	24	29	26	17	7	21	8	17	9	79	Female	19	No	12	White (German, Irish, English, Italian, Polish, French, etc.)		Never	Never	Never	Never	0.625328	-0.024052	1
75	0.8	24	1.37567	2.64952	2.76038	2.56061	2.65444	30	2.94263	0.992647	0.666667	135	16	1.54688	2.60067	64	27	17	19	19	8	12	5	10	9	63	Female	19	No	12	White (German, Irish, English, Italian, Polish, French, etc.)		Never	Never	Never	Never	0.29311	0.110866	1
76	0.657895	25	1.09219	2.72038	2.86078	2.3832	2.73082	38	2.92281	0.881481	0.6	119	15	2.26667	2.66095	53	16	23	31	11	5	16	7	19	12	70	Female	19	No	12	Hispanic, Latin, or Spanish origin (e.g., Mexican or Mexican American, Puerto Rican, Cuban, Dominican etc.)		Never	Never	Never	Never	0.20243	0.140397	1
77	0	0		2.01171	2.01008		2.01139	31		0.9375		150	0	1.92181	2.00788	36	13	18	16	7	6	14	4	8	8	47	Female	20	No	14	White (German, Irish, English, Italian, Polish, French, etc.)		Never	2-3 times a week	1-2 drinks	Never		-0.00163037	0
78	0.428571	12	1.2524	2.40331	2.34842	2.45834	2.39717	28	2.27666	0.939189	0.583333	139	7	1	2.45408	45	15	18	15	8	7	10	8	9	6	48	Male	23	No	16	White (German, Irish, English, Italian, Polish, French, etc.)		Never	1-2 times a week	1-2 drinks	Never	-0.126657	-0.0548921	1
79	0.04	1	1.08454	3.01836	3.04519		3.02246	25	4.57082	0.886792	0	141	0	4.80117	2.98884	35	15	24	22	11	4	14	10	12	10	61	Female	20	No	13	White (German, Irish, English, Italian, Polish, French, etc.)		Never	Only occasionally	1-2 drinks	Never	1.55246	0.0268311	1
80	0.580645	18	1.01482	1.87575	1.71639	2.84266	1.86116	31	2.18366	0.957746	0.777778	136	14	2.95513	1.82022	24	17	20	20	12	5	14	6	7	13	57	Male	20	No	12	Hispanic, Latin, or Spanish origin (e.g., Mexican or Mexican American, Puerto Rican, Cuban, Dominican etc.)		Never	Only occasionally	1-2 drinks	Never	0.307903	-0.159361	1
81	0.2	6	1.35396	1.81763	1.91369	2.69983	1.8326	30	1.98477	0.837662	0.333333	129	2	3.96127	1.84173	34	25	27	29	17	8	18	9	17	12	81	Female	20	No	14	Mixed Race		Never	1-2 times a week	1-2 drinks	Never	0.167145	0.0960605	1
82	0	0		2.55956	2.50862		2.54842	35		0.91875		147	0	3.99464	2.57388	40	14	21	30	9	5	13	8	15	15	65	Male	20	No	13	Hispanic, Latin, or Spanish origin (e.g., Mexican or Mexican American, Puerto Rican, Cuban, Dominican etc.)		Never	Only occasionally	1-2 drinks	Never		-0.0509456	0
83	0	0		2.31092	2.45246		2.34277	36		0.96875		155	0	1.98148	2.34313	32	27	23	32	18	9	16	7	18	14	82	Male	19	No	12	White (German, Irish, English, Italian, Polish, French, etc.)		Rarely (~1 a week)	1-2 times a week	More than 5 drinks	Only occasionally		0.141539	0
84	0.0952381	2	0.808665	1.65196	1.78322	2.16041	1.66774	21	1.90119	0.993671	1	157	2	2.12231	1.65901	35	16	18	19	8	8	13	5	12	7	53	Male	19	No	12	White (German, Irish, English, Italian, Polish, French, etc.)		Never	Never	Never	Never	0.249237	0.131267	1
85	0.225806	7	1.41376	2.94305	2.80339	3.67501	2.92027	31	4.46254	0.895425	0.142857	137	1	2.33333	2.89517	38	15	17	24	9	6	12	5	15	9	56	Male	20	No	13	White (German, Irish, English, Italian, Polish, French, etc.)		Never	Only occasionally	1-2 drinks	Never	1.51949	-0.139664	1
86	0.870968	27	1.20897	2.85365	2.65206	2.71195	2.84749	31	2.97989	0.87218	0.62963	116	17	4.29293	2.80548	38	21	17	23	13	8	13	4	12	11	61	Female	19	No	12	White (German, Irish, English, Italian, Polish, French, etc.)		Never	Only occasionally	3-5 drinks	Never	0.126244	-0.201584	1
87	0.555556	10	1.18643	2.21928	2.38122	2.89272	2.22809	18	2.69394	0.96	1	144	10	3.7622	2.21156	26	16	17	23	11	5	10	7	12	11	56	Female	20	No	12	White (German, Irish, English, Italian, Polish, French, etc.)		Never	Only occasionally	3-5 drinks	Never	0.47466	0.161933	1
88	0.56	14	1.5499	2.99291	2.95091	3.82036	2.98966	25	2.92037	0.90411	0.428571	132	6	2.66111	2.99108	36	18	18	28	12	6	12	6	16	12	64	Female	19	No	12	Mixed Race		Never	Only occasionally	1-2 drinks	Only occasionally	-0.0725365	-0.0419954	1
89	1	27	1.14694	2.12833		2.21743	2.12833	27	2.11812	0.954887	0.555556	127	15	2.97895	2.12206	44	17	18	21	9	8	13	5	11	10	56	Male	19	No	12	White (German, Irish, English, Italian, Polish, French, etc.)		Never	Never	Never	Never	-0.0102071		1
90	0	0		2.01132	1.91823		1.99561	27		0.9625		154	0	1.53623	1.98661	34	15	23	26	11	4	16	7	14	12	64	Male	19	No	12	White (German, Irish, English, Italian, Polish, French, etc.)		Never	1-2 times a week	3-5 drinks	Never		-0.0930884	0
91	0.517241	15	1.20228	1.8911	2.06122	2.3605	1.90764	29	1.79643	0.944828	0.866667	137	13	1.34167	1.88045	36	19	21	23	10	9	13	8	12	11	63	Female	19	No	12	White (German, Irish, English, Italian, Polish, French, etc.)		Never	Never	Never	Never	-0.0946729	0.170113	1
92	0	0		1.89352	1.91122		1.8963	26		0.975		156	0	1.60714	1.87658	33	13	21	30	10	3	15	6	18	12	64	Male	19	No	12	Mixed Race		Frequently (> 5 a day)	1-2 times a week	More than 5 drinks	Only occasionally		0.0177039	0
93	0.0357143	1	2.23554	2.03145	2.06779	2.66941	2.03743	28	2.90251	0.955975	0	152	0	1.38269	2.03573	43	15	13	22	11	4	8	5	11	11	50	Female	19	No	12	Hispanic, Latin, or Spanish origin (e.g., Mexican or Mexican American, Puerto Rican, Cuban, Dominican etc.)		Never	Never	Never	Never	0.871062	0.036336	1
