# Supplementary material for: Effects of media multitasking frequency on a novel volitional multitasking paradigm
Source: PeerJ journal article supplement (doi:10.7717/peerj.12603), 2022-01-27
Supplement: SupplementalFigureS1.pdf [file SupplementalFigureS1.pdf]

$$\text{MMI} = \sum_{i=1}^{11} \frac{m_i \times h_i}{h_{\text{total}}}$$
